# Supplementary material for: Association of Infant Physical Development and Rapid Growth With Pubertal Onset Among Girls in Rural China
Source: PubMed Central journal article supplement (PMC8094009; doi:10.1001/jamanetworkopen.2021.6831), 2021-05-03

## Supplementary Online Content

Wei J, Liu S, Cheng Y, Yang W, Zhu Z, Zeng L. Association of infant physical development and rapid growth with pubertal onset among girls in rural China. *JAMA Netw Open*. 2021;4(5):e216831. doi:10.1001/jamanetworkopen.2021.6831

**eTable.** Comparison of Baseline Characteristics of the Adolescents Followed Up and Lost to Follow-up

**eFigure.** Participant Flowchart

This supplementary material has been provided by the authors to give readers additional information about their work.

**eTable. Comparison of Baseline Characteristics of the Adolescents Followed Up and Lost to Follow-up**

|                                                           | Follow-up/ n (%) | Lost to follow-up/ n (%) | P value <sup>a</sup> |
|-----------------------------------------------------------|------------------|--------------------------|----------------------|
| Total number                                              | 294(53.8)        | 253(46.2)                |                      |
| <b>Parental characteristics in pregnancy</b>              |                  |                          |                      |
| Maternal age (years) (Mean ± standard deviation)          | 23.43(4.09)      | 23.71(4.05)              | 0.42                 |
| Maternal education                                        |                  |                          |                      |
| < 3 years                                                 | 12(4.1)          | 5(2.0)                   | 0.06                 |
| Primary                                                   | 59(20.1)         | 48(19.0)                 |                      |
| Secondary                                                 | 168(57.3)        | 169(66.8)                |                      |
| High school+                                              | 54(18.5)         | 31(12.2)                 |                      |
| Maternal occupation                                       |                  |                          |                      |
| Farmer                                                    | 237(81.0)        | 210(83.3)                | 0.46                 |
| Others                                                    | 56(19.0)         | 42(16.7)                 |                      |
| Parity                                                    |                  |                          |                      |
| 0                                                         | 231(78.6)        | 194(76.7)                | 0.02                 |
| 1                                                         | 49(16.7)         | 56(22.1)                 |                      |
| ≥ 2                                                       | 14(4.7)          | 3(1.2)                   |                      |
| Randomized regimens                                       |                  |                          |                      |
| Folic acid                                                | 99(33.7)         | 84(33.2)                 | 0.82                 |
| Iron/Folic acid                                           | 94(32.0)         | 87(34.4)                 |                      |
| Multiple micronutrients                                   | 101(34.3)        | 82(32.4)                 |                      |
| Paternal age (years) (Mean ± standard deviation)          | 26.71(3.96)      | 27.13(3.98)              | 0.21                 |
| Paternal education                                        |                  |                          |                      |
| < 3 years                                                 | 3(1.0)           | 0(0.0)                   | 0.29                 |
| Primary                                                   | 21(7.1)          | 18(7.2)                  |                      |
| Secondary                                                 | 190(64.6)        | 174(69.3)                |                      |
| High school+                                              | 80(27.3)         | 59(23.5)                 |                      |
| Paternal occupation                                       |                  |                          |                      |
| Farmer                                                    | 207(70.4)        | 189(74.7)                | 0.26                 |
| Others                                                    | 87(29.6)         | 64(25.3)                 |                      |
| Household wealth index                                    |                  |                          |                      |
| Low                                                       | 71(24.2)         | 57(22.5)                 | 0.90                 |
| Middle                                                    | 110(37.4)        | 96(37.9)                 |                      |
| High                                                      | 113(38.4)        | 100(39.6)                |                      |
| <b>Infant</b>                                             |                  |                          |                      |
| Birth weight(g) (Mean ± standard deviation)               | 3094(380)        | 3058(375)                | 0.26                 |
| Birth length(cm) (Mean ± standard deviation)              | 48.9(2.3)        | 48.7(2.4)                | 0.38                 |
| Gestational weeks at delivery (Mean ± standard deviation) | 40(1)            | 40(2)                    | 0.87                 |

|                                                                      | Follow-up/ n (%) | Lost to follow-up/ n (%) | P value <sup>a</sup> |
|----------------------------------------------------------------------|------------------|--------------------------|----------------------|
| Small for gestational age (< 10 <sup>th</sup> population percentile) |                  |                          |                      |
| No                                                                   | 236(82.5)        | 198(80.5)                | 0.55                 |
| Yes                                                                  | 50(17.5)         | 48(19.5)                 |                      |
| Low birth weight (<2500g)                                            |                  |                          |                      |
| No                                                                   | 279(95.2)        | 238(95.6)                | 0.84                 |
| Yes                                                                  | 14(4.8)          | 11(4.4)                  |                      |
| Preterm birth (<37 weeks)                                            |                  |                          |                      |
| No                                                                   | 287(97.6)        | 242(95.6)                | 0.20                 |
| Yes                                                                  | 7(2.4)           | 11(4.4)                  |                      |

<sup>a</sup> Comparisons were conducted using analysis of t test for continuous variables and  $\chi^2$  test for categorical variables, respectively.

**eFigure. Participant Flowchart**

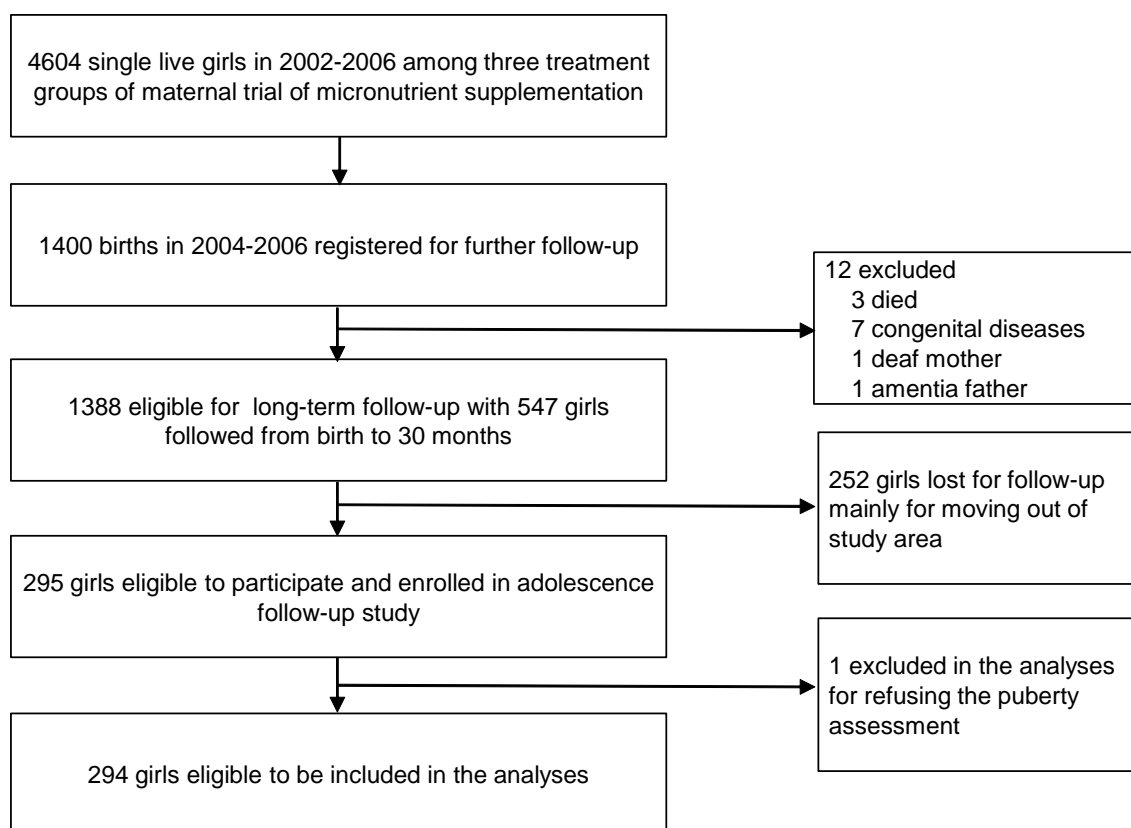

Supplement: jamanetwopen-e216831-s001.pdf [file jamanetwopen-e216831-s001.pdf]
